# Supplementary material
Source: Springer Nature journal article supplement (https://www.springermedizin.de/resource/supplementary/13075_2009_2751_MOESM4_ESM.pdf/9692804)

**A**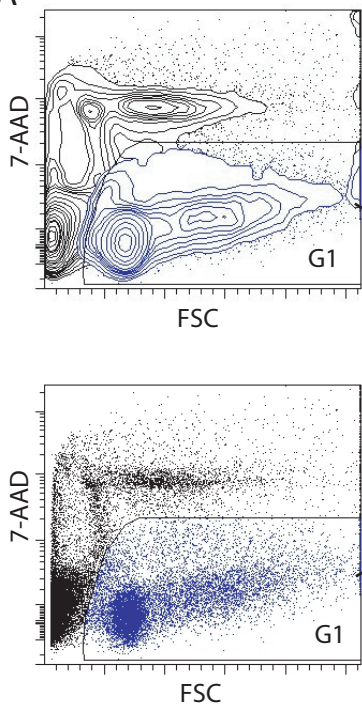**B**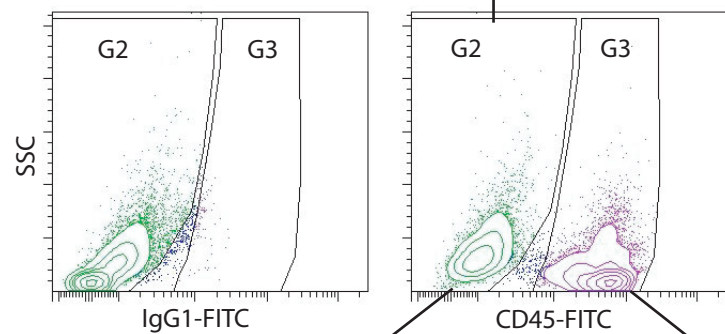**C**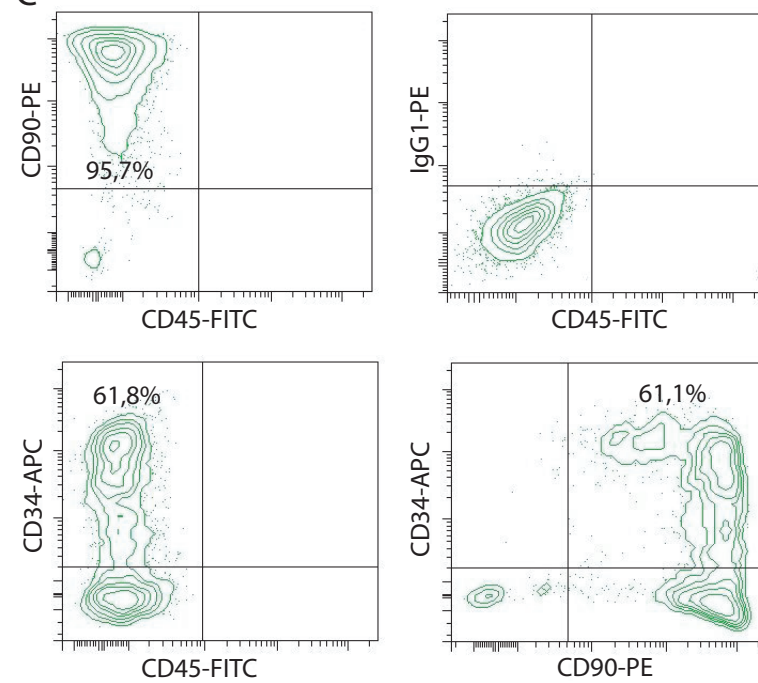**D**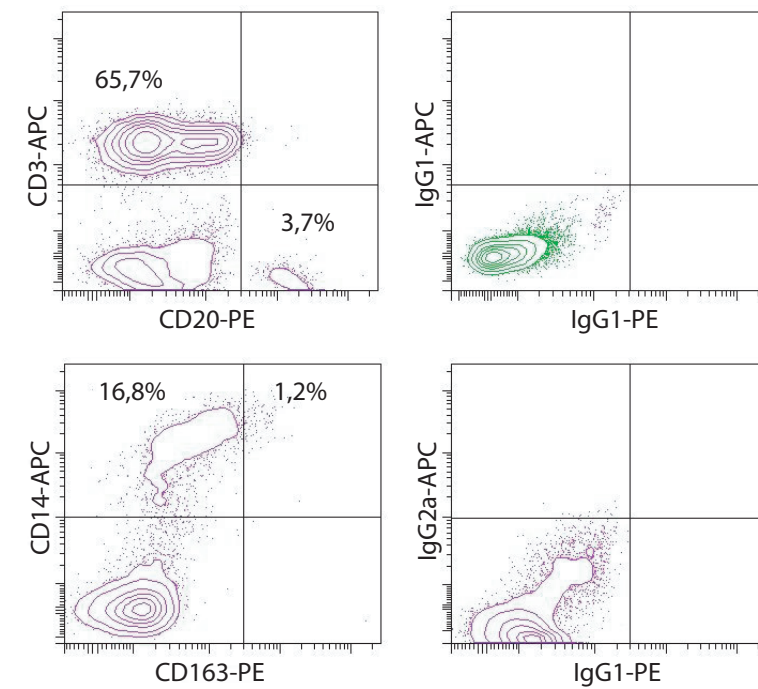**F**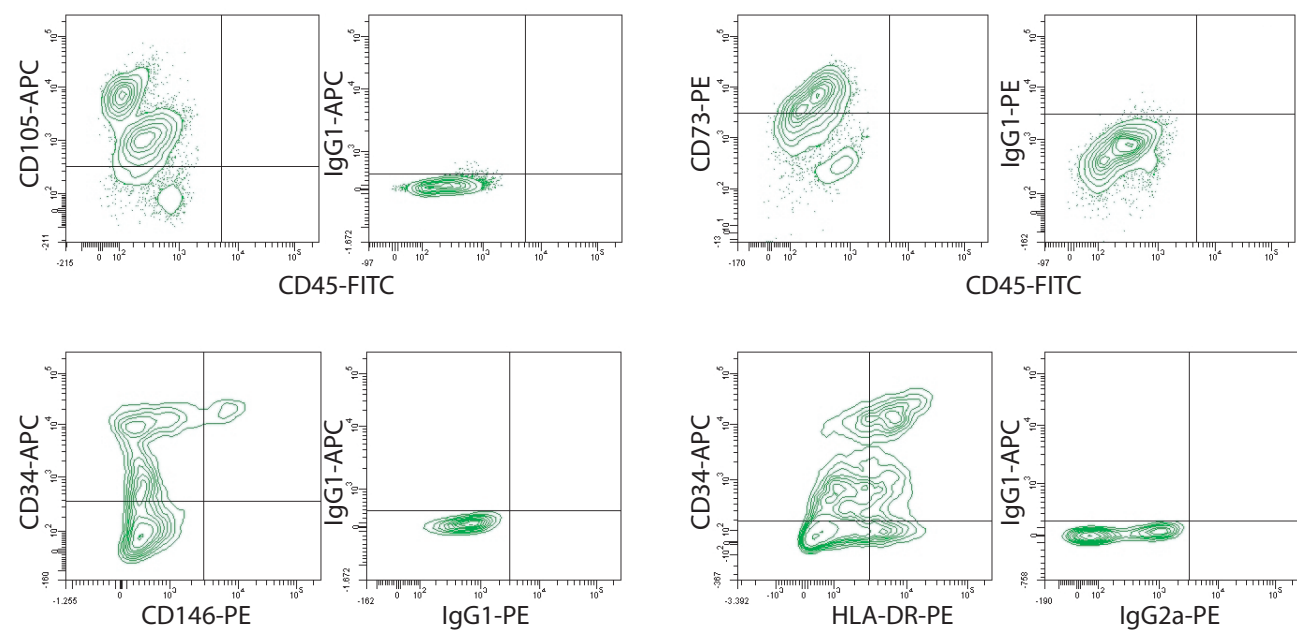

Supplement: MOESM4 [file 9692804]
